# Supplementary material
Source: Elsevier journal article supplement (https://www.sciencedirect.com/science/article/pii/S1699258X17301687)
Supplement: mmc2 [file S1699258X17301687:mmc2.pdf]

## Anexo 2. Cuestionario telefónico para estudio de la sospecha por el reumatólogo

Código de identificación del sujeto

Fecha de la entrevista telefónica: (dd/mm/aaaa)

\_\_/\_\_/\_\_\_\_

### Sospecha de fibromialgia. Cuestionario telefónico

1. De acuerdo con el cuestionario realizado en (*decir la fecha de la entrevista hecha por el call center*), usted siente dolor en la mayor parte de su cuerpo desde hace al menos 3 meses. ¿Es así? ☐ Sí ☐ No

**Si respuesta afirmativa a la pregunta 1, continuar preguntando:**

2. ¿Tiene dolor en hombros, brazos o manos? ☐ Sí ☐ No
3. ¿De qué lado? ☐ Derecho ☐ Izquierdo ☐ Ambos
4. ¿Tiene dolor en las caderas, las piernas o en los pies? ☐ Sí ☐ No
5. ¿De qué lado? ☐ Derecho ☐ Izquierdo ☐ Ambos
6. ¿Tiene dolor en el cuello, en el pecho o en la espalda? ☐ Sí ☐ No
7. ¿Qué puntuación le daría a su dolor en una escala de 0 a 10, si 0 es no dolor y 10 es el máximo dolor imaginable?
- 0      1      2      3      4      5      6      7      8      9      10
8. ¿Le duele porque ha tenido algún accidente, traumatismo o golpe? ☐ Sí ☐ No

**Teniendo en cuenta las respuestas anteriores:**

9. Resultado del cribado de fibromialgia ☐ Positivo ☐ Negativo
10. ¿Mantiene usted la sospecha de fibromialgia? ☐ Sí ☐ No
11. Motivo de la sospecha negativa (indicar en caso de que se decida no mantener la sospecha cuando el resultado del cribado de acuerdo a los criterios definidos por el comité científico es positivo):

### Sospecha de artrosis de columna cervical. Cuestionario telefónico

1. De acuerdo con el cuestionario realizado en (*decir la fecha de la entrevista hecha por el call center*), tiene o ha tenido dolor en el cuello (o dolor cervical/de cervicales), sin que haya sido por un golpe/caída o sobreesfuerzo. ¿Es así? ☐ Sí ☐ No
- Si respuesta afirmativa a la pregunta 1, continuar preguntando:**
2. ¿Ha durado ese dolor 3 o más meses seguidos, aunque el dolor no sea fijo / tenga altibajos? ☐ Sí ☐ No

**Si respuesta afirmativa a la pregunta 2, continuar preguntando:**

3. ¿Empeora al mover el cuello o girar la cabeza? ☐ Sí ☐ No

**Si respuesta afirmativa a las preguntas 2 y 3, continuar preguntando:**

4. ¿Le han hecho una radiografía para estudiar ese dolor? ☐ Sí ☐ No

**Si respuesta afirmativa a la pregunta 4, continuar preguntando:**

5. ¿Recuerda el resultado de esa radiografía?  
☐ Normal ☐ Con alteraciones ☐ No recuerda

**Teniendo en cuenta las respuestas anteriores:**

6. Resultado del cribado de artrosis cervical ☐ Positivo ☐ Negativo  
7. ¿Mantiene usted la sospecha de artrosis de columna cervical? ☐ Sí ☐ No  
Motivo de la sospecha negativa (indicar en caso de que se decida no mantener la sospecha cuando el resultado del cribado de acuerdo a los criterios definidos por el comité científico es positivo):

**Sospecha de artrosis de columna lumbar. Cuestionario telefónico**

1. De acuerdo con el cuestionario realizado en (*decir la fecha de la entrevista hecha por el call center*), tiene o ha tenido dolor en la parte baja de la espalda/cintura/espalda a la altura de los riñones/en la zona lumbar/en las lumbares/lumbago o lumbalgia, sin que haya sido por un golpe/caída o sobreesfuerzo. ¿Es así? ☐ Sí ☐ No

**Si respuesta afirmativa a la pregunta 1, continuar preguntando:**

2. ¿Ha durado ese dolor 3 o más meses seguidos, aunque el dolor no sea fijo / tenga altibajos?  
☐ Sí ☐ No

**Si respuesta afirmativa a la pregunta 2, continuar preguntando:**

3. ¿Empeora al coger peso o hacer esfuerzos? ☐ Sí ☐ No

**Si respuesta afirmativa a las preguntas 2 y 3, continuar preguntando:**

4. ¿Le han hecho una radiografía para estudiar ese dolor? ☐ Sí ☐ No

**Si respuesta afirmativa a la pregunta 4, continuar preguntando:**

5. ¿Recuerda el resultado de esa radiografía?  
☐ Normal ☐ Con alteraciones ☐ No recuerda

**Teniendo en cuenta las respuestas anteriores:**

6. Resultado del cribado de artrosis de columna lumbar ☐ Positivo ☐ Negativo  
7. ¿Mantiene usted la sospecha de artrosis de columna lumbar? ☐ Sí ☐ No  
8. Motivo de la sospecha negativa (indicar en caso de que se decida no mantener la sospecha cuando el resultado del cribado de acuerdo a los criterios definidos por el comité científico es positivo):

**Sospecha de lumbalgia inflamatoria. Cuestionario telefónico**

1. De acuerdo con el cuestionario realizado en (*decir la fecha de la entrevista hecha por el call center*), tiene o ha tenido dolor en la parte baja de la espalda/cintura/espalda a la altura de

los riñones/en la zona lumbar/en las lumbares/lumbago o lumbalgia, sin que haya sido por un golpe / caída o sobreesfuerzo. ¿Es así? ☐ Sí ☐ No

**Si respuesta afirmativa a la pregunta 1, continuar preguntando:**

2. ¿Ha durado ese dolor 3 o más meses seguidos, aunque el dolor no sea fijo / tenga altibajos? ☐ Sí ☐ No

**Si respuesta afirmativa a la pregunta 2, continuar preguntando:**

3. ¿Mejora con la actividad física y el ejercicio? ☐ Sí ☐ No
4. ¿Mejora con el reposo? ☐ Sí ☐ No
5. ¿Le despierta el dolor por la noche? ☐ Sí ☐ No
6. ¿Empezó antes de los 45 años? ☐ Sí ☐ No
7. ¿Le ha dicho su médico que tiene o ha tenido:
- a. Psoriasis ☐ Sí ☐ No
  - b. Enfermedad inflamatoria intestinal (colitis ulcerosa/enfermedad de Crohn) ☐ Sí ☐ No
  - c. Uveítis (posible aclaración para el sujeto: ponerse el ojo rojo que haya tenido que ir al oculista y que no fuese por infección) ☐ Sí ☐ No
8. A algún familiar cercano (abuelos, padres, hermanos o hijos) le han diagnosticado:
- a. Espondilitis anquilosante ☐ Sí ☐ No
  - b. Psoriasis ☐ Sí ☐ No
  - c. Enfermedad inflamatoria intestinal/colitis ulcerosa/enfermedad de Crohn ☐ Sí ☐ No

**Teniendo en cuenta las respuestas anteriores:**

9. Resultado del cribado de lumbalgia inflamatoria ☐ Positivo ☐ Negativo
10. ¿Mantiene usted la sospecha de lumbalgia inflamatoria? ☐ Sí ☐ No
11. Motivo de la sospecha negativa (indicar en caso de que se decida no mantener la sospecha cuando el resultado del cribado de acuerdo a los criterios definidos por el comité científico es positivo):

### Sospecha Artritis o Artrosis Periférica (mano, cadera o rodilla). Cuestionario telefónico

1. De acuerdo con el cuestionario realizado en (*decir la fecha de la entrevista hecha por el call center*), usted tiene o ha tenido dolor en (*decir la localización por el cuestionario del call center*), sin que haya recibido golpe/caída o sobreesfuerzo. ¿Es así? ☐ Sí ☐ No

**Si respuesta afirmativa a la pregunta 1, continuar preguntando:**

2. ¿Le ha durado el dolor más de 4 semanas seguidas? ☐ Sí ☐ No

**Si respuesta afirmativa a la pregunta 2, continuar preguntando:**

3. Localización:
- Mano ☐ Sí ☐ No
  - Lateralidad ☐ Ambas ☐ Derecha ☐ Izquierda
  - Cadera ☐ Sí ☐ No
  - Lateralidad ☐ Ambas ☐ Derecha ☐ Izquierda
  - Rodilla ☐ Sí ☐ No
  - Lateralidad ☐ Ambas ☐ Derecha ☐ Izquierda

Tobillo ☐ Sí ☐ No  
 Lateralidad ☐ Ambas ☐ Derecha ☐ Izquierda  
 Pie ☐ Sí ☐ No  
 Lateralidad ☐ Ambas ☐ Derecha ☐ Izquierda

4. ¿Ha tendido inflamación/hinchazón de forma mantenida en (*decir la localización afectada*) más de 4 semanas? ☐ Sí ☐ No
5. El dolor de cadera/ingle, ¿empeora con el esfuerzo, al caminar o subir/bajar escaleras? ☐ Sí ☐ No  
 ó
6. ¿mejora con la actividad física/el ejercicio? ☐ Sí ☐ No
7. ¿Mejora el dolor de cadera/ingle con el reposo? ☐ Sí ☐ No
8. El dolor de rodilla(s), ¿empeora con el esfuerzo, al caminar o subir/bajar escaleras? ☐ Sí ☐ No  
 ó
9. ¿mejora con la actividad física/el ejercicio? ☐ Sí ☐ No
10. ¿Mejora el dolor de rodilla(s) con el reposo? ☐ Sí ☐ No
11. El dolor de tobillo, ¿empeora con el esfuerzo, al caminar o subir/bajar escaleras? ☐ Sí ☐ No  
 ó
12. ¿mejora con la actividad física/el ejercicio? ☐ Sí ☐ No
13. ¿Mejora el dolor de tobillo con el reposo? ☐ Sí ☐ No
14. El dolor de pie, ¿empeora con el esfuerzo, al caminar o subir/bajar escaleras? ☐ Sí ☐ No  
 ó
15. ¿mejora con la actividad física/el ejercicio? ☐ Sí ☐ No
16. ¿Mejora el dolor de pie con el reposo? ☐ Sí ☐ No
17. El dolor de mano(s), ¿empeora al usar las manos/mover los dedos? ☐ Sí ☐ No  
 ó
18. ¿mejora al usar las manos/mover los dedos? ☐ Sí ☐ No
19. ¿Mejora el dolor de mano(s) con el reposo? ☐ Sí ☐ No
20. ¿Le ocurre que por la mañana no puede mover la zona(s) afectada(s) o la(s) encuentra rígida(s)? ☐ Sí ☐ No  
*Si respuesta afirmativa a la pregunta 20, preguntar:*
21. ¿Durante más de media hora? ☐ Sí ☐ No

***Si pregunta 5, 8 o 17 son Sí y el sujeto tiene 40 o más años, responder a las preguntas 22 a 27 según corresponda por la localización***

22. ¿Le han hecho una radiografía para estudiar el dolor de cadera(s)/ingle(s)? ☐ Sí ☐ No
23. ¿Recuerda el resultado? ☐ Normal ☐ Con alteraciones ☐ No recuerda
24. ¿Le han hecho una radiografía para estudiar el dolor de rodilla(s)? ☐ Sí ☐ No
25. ¿Recuerda el resultado? ☐ Normal ☐ Con alteraciones ☐ No recuerda
26. ¿Le han hecho una radiografía para estudiar dolor de mano(s)? ☐ Sí ☐ No
27. ¿Recuerda el resultado? ☐ Normal ☐ Con alteraciones ☐ No recuerda

**Teniendo en cuenta las respuestas anteriores:**

28. Resultado cribado artritis ☐ Positivo ☐ Negativo
29. Resultado cribado artrosis ☐ Positivo ☐ Negativo

30. ¿Sospecha usted que el sujeto tiene artritis? ☐ Sí ☐ No
31. ¿Sospecha usted que el sujeto tiene artrosis? ☐ Sí ☐ No
32. Motivo de la sospecha negativa de artritis (indicar en caso de que se decida no mantener la sospecha cuando el resultado del cribado de acuerdo a los criterios definidos por el comité científico es positivo):
33. Motivo de la sospecha negativa de artrosis (indicar en caso de que se decida no mantener la sospecha cuando el resultado del cribado de acuerdo a los criterios definidos por el comité científico es positivo):

### Sospecha de artritis psoriásica (lumbalgia inflamatoria). Cuestionario telefónico

1. De acuerdo con el cuestionario realizado en (decir la fecha de la entrevista hecha por el call center), tiene o ha tenido dolor en la parte baja de la espalda/cintura/espalda a la altura de los riñones/en la zona lumbar/en las lumbares/lumbago o lumbalgia, sin que haya sido por un golpe / caída o sobreesfuerzo. ¿Es así? ☐ Sí ☐ No
- Si respuesta afirmativa a la pregunta 1, continuar preguntando:**
2. ¿Ha durado ese dolor 3 o más meses seguidos, aunque el dolor no sea fijo / tenga altibajos? ☐ Sí ☐ No
- Si respuesta afirmativa a la pregunta 2, continuar preguntando:**
3. ¿Mejora con la actividad física y el ejercicio? ☐ Sí ☐ No
4. ¿Mejora con el reposo? ☐ Sí ☐ No
5. ¿Le despierta el dolor por la noche? ☐ Sí ☐ No
6. ¿Empezó antes de los 45 años? ☐ Sí ☐ No
7. ¿Le ha dicho su médico que tiene o ha tenido:
- ☐ Psoriasis
  - ☐ Enfermedad inflamatoria intestinal (colitis ulcerosa/enfermedad de Crohn)
  - ☐ Uveítis (posible aclaración para el sujeto: ponerse el ojo rojo y doloroso que haya tenido que ir al oculista y que no fuese por infección)
  - ☐ Ninguna de las anteriores
8. A algún familiar cercano (abuelos, padres, hermanos o hijos) le han diagnosticado:
- ☐ Psoriasis
  - ☐ Espondilitis anquilosante
  - ☐ Enfermedad inflamatoria intestinal/colitis ulcerosa/enfermedad de Crohn
  - ☐ Ninguna de las anteriores

#### Teniendo en cuenta las respuestas anteriores:

9. Resultado del cribado de artritis psoriásica ☐ Positivo ☐ Negativo
10. ¿Mantiene usted la sospecha de artritis psoriásica? ☐ Sí ☐ No
11. Motivo de la sospecha negativa (indicar en caso de que se decida no mantener la sospecha cuando el resultado del cribado de acuerdo a los criterios definidos por el comité científico es positivo):

#### Si **NO** se mantiene la sospecha de artritis psoriásica:

¿Existe sospecha de lumbalgia inflamatoria?

### Sospecha de artritis psoriásica (artritis). Cuestionario telefónico.

1. De acuerdo con el cuestionario realizado en (*decir la fecha de la entrevista hecha por el call center*), usted tiene o ha tenido dolor en (*decir la localización por el cuestionario del call center*), sin que haya recibido golpe/caída o sobreesfuerzo. ¿Es así?  
☐ Sí ☐ No

**Si respuesta afirmativa a la pregunta 1, continuar preguntando:**

2. ¿Le ha durado el dolor más de 4 semanas seguidas? ☐ Sí ☐ No

**Si respuesta afirmativa a la pregunta 2, continuar preguntando:**

3. Localización:

Mano ☐ Sí ☐ No  
Lateralidad ☐ Ambas ☐ Derecha ☐ Izquierda  
Cadera ☐ Sí ☐ No  
Lateralidad ☐ Ambas ☐ Derecha ☐ Izquierda  
Rodilla ☐ Sí ☐ No  
Lateralidad ☐ Ambas ☐ Derecha ☐ Izquierda  
Tobillo ☐ Sí ☐ No  
Lateralidad ☐ Ambas ☐ Derecha ☐ Izquierda  
Pie ☐ Sí ☐ No  
Lateralidad ☐ Ambas ☐ Derecha ☐ Izquierda

4. ¿Ha tendido inflamación/hinchazón de forma mantenida en (*decir la localización afectada*) más de 4 semanas? ☐ Sí ☐ No

5. El dolor de cadera/ingle, ¿empeora con el esfuerzo, al caminar o subir/bajar escaleras?  
☐ Sí ☐ No

ó

6. ¿mejora con la actividad física/el ejercicio? ☐ Sí ☐ No

7. ¿Mejora el dolor de cadera/ingle con el reposo? ☐ Sí ☐ No

8. El dolor de rodilla(s), ¿empeora con el esfuerzo, al caminar o subir/bajar escaleras?  
☐ Sí ☐ No

ó

9. ¿mejora con la actividad física/el ejercicio? ☐ Sí ☐ No

10. ¿Mejora el dolor de rodilla(s) con el reposo? ☐ Sí ☐ No

11. El dolor de tobillo, ¿empeora con el esfuerzo, al caminar o subir/bajar escaleras?  
☐ Sí ☐ No

ó

12. ¿mejora con la actividad física/el ejercicio? ☐ Sí ☐ No

13. ¿Mejora el dolor de tobillo con el reposo? ☐ Sí ☐ No

14. ¿El dolor de pie ¿empeora con el esfuerzo, al caminar o subir/bajar escaleras?  
☐ Sí ☐ No

ó

15. ¿mejora con la actividad física/el ejercicio? ☐ Sí ☐ No

16. ¿Mejora el dolor de pie con el reposo? ☐ Sí ☐ No

17. El dolor de mano(s), ¿empeora al usar las manos/mover los dedos? ☐ Sí ☐ No

ó

18. ¿mejora al usar las manos/mover los dedos? ☐ Sí ☐ No
19. ¿Mejora el dolor de mano(s) con el reposo? ☐ Sí ☐ No
20. ¿Le ocurre que por la mañana no puede mover la zona(s) afectada(s) o la(s) encuentra rígida(s)? ☐ Sí ☐ No  
Si respuesta afirmativa a la pregunta 20, preguntar:
21. ¿Durante más de media hora? ☐ Sí ☐ No

***Si pregunta 5, 8 o 17 son Sí y el sujeto tiene 40 o más años, responder a las preguntas 22 a 27 según corresponda por la localización***

22. ¿Le han hecho una radiografía para estudiar el dolor de cadera(s)/ingle(s)? ☐ Sí ☐ No
23. ¿Recuerda el resultado? ☐ Normal ☐ Con alteraciones ☐ No recuerda
24. ¿Le han hecho una radiografía para estudiar el dolor de rodilla(s)? ☐ Sí ☐ No
25. ¿Recuerda el resultado? ☐ Normal ☐ Con alteraciones ☐ No recuerda
26. ¿Le han hecho una radiografía para estudiar dolor de mano(s)? ☐ Sí ☐ No
27. ¿Recuerda el resultado? ☐ Normal ☐ Con alteraciones ☐ No recuerda

**Teniendo en cuenta las respuestas anteriores:**

28. Resultado cribado artritis ☐ Positivo ☐ Negativo
29. Resultado cribado artrosis ☐ Positivo ☐ Negativo
30. ¿Sospecha usted que el sujeto tiene artritis? ☐ Sí ☐ No
31. ¿Sospecha usted que el sujeto tiene artrosis? ☐ Sí ☐ No
32. Motivo de la sospecha negativa de artritis (indicar en caso de que se decida no mantener la sospecha cuando el resultado del cribado de acuerdo a los criterios definidos por el comité científico es positivo):
33. Motivo de la sospecha negativa de artrosis (indicar en caso de que se decida no mantener la sospecha cuando el resultado del cribado de acuerdo a los criterios definidos por el comité científico es positivo):

**Si hay sospecha de artritis, continuar preguntando:**

34. ¿Le ha dicho su médico que tiene o ha tenido psoriasis? ☐ Sí ☐ No
35. ¿A algún familiar cercano (abuelos, padres, hermanos o hijos) le han diagnosticado psoriasis? ☐ Sí ☐ No
- Teniendo en cuenta las respuestas anteriores:**
36. ¿Mantiene usted la sospecha de artritis psoriásica? ☐ Sí ☐ No

**Sospecha de artritis psoriásica (entesitis). Cuestionario telefónico**

1. ¿Le duele o le ha dolido el talón, o lo ha notado hinchado (sin que haya sido por un golpe o sobreesfuerzo)? ☐ Sí ☐ No
- Si respuesta afirmativa a la pregunta 1, continuar preguntando:**
2. ¿Le ha dicho su médico que tiene o ha tenido psoriasis? ☐ Sí ☐ No
3. ¿A algún familiar cercano (abuelos, padres, hermanos o hijos) le han diagnosticado psoriasis? ☐ Sí ☐ No

**Teniendo en cuenta las respuestas anteriores:**

4. ¿Se mantiene la sospecha de artritis psoriásica? ☐ Sí ☐ No

### Sospecha de gota. Cuestionario telefónico

1. De acuerdo con el cuestionario realizado en *(fecha de la entrevista hecha por el call center)*, usted en alguna ocasión ha tenido dolor e hinchazón de una o dos articulaciones que ha cedido completamente en 1-2 semanas / dolor e hinchazón del dedo gordo del pie que ha cedido completamente en 1-2 semanas *(preguntar una u otra en función de la respuesta dada en el cuestionario del call center)*. ¿Es así?

☐ Sí ☐ No

**Si respuesta afirmativa a la pregunta 1, continuar preguntando:**

2. Durante ese episodio de dolor, ¿estaba la zona afectada enrojecida? ☐ Sí ☐ No
3. Durante ese episodio de dolor, ¿sentía que no podía aguantar el contacto o la presión sobre la zona afectada? ☐ Sí ☐ No
4. ¿Le han dicho que tiene el ácido úrico alto o problemas con el ácido úrico? ☐ Sí ☐ No

**Teniendo en cuenta las respuestas anteriores:**

5. Resultado del cribado de gota ☐ Positivo ☐ Negativo
6. ¿Mantiene usted la sospecha de gota? ☐ Sí ☐ No
7. Motivo de la sospecha negativa (indicar en caso de que se decida no mantener la sospecha cuando el resultado del cribado de acuerdo a los criterios definidos por el comité científico es positivo):

### Sospecha de síndrome de Sjögren. Cuestionario telefónico

1. ¿Tiene sequedad en los ojos que le moleste a diario? ☐ Sí ☐ No
- a. ¿Desde hace más de 3 meses? *(preguntar en caso de Sí en pregunta 1)* ☐ Sí ☐ No
2. ¿Tiene sensación de arenilla o tierra en los ojos de forma repetida? ☐ Sí ☐ No
3. ¿Usa lágrimas artificiales más de 3 veces al día? ☐ Sí ☐ No
4. ¿Nota la boca seca a diario? ☐ Sí ☐ No
- b. ¿Desde hace más de 3 meses? *(preguntar en caso de Sí en pregunta 4)* ☐ Sí ☐ No
5. Durante las comidas, ¿bebe con frecuencia para ayudarse a tragar? ☐ Sí ☐ No
6. ¿Ha tenido siendo adulto hinchazón de las parótidas/hinchazón como la de las paperas de forma mantenida o repetida? ☐ Sí ☐ No
7. ¿Toma alguna medicación que pueda producir sequedad: tratamiento de la HTA, alergia, depresión/ansiedad/otra enfermedad psiquiátrica? ☐ Sí ☐ No

**Teniendo en cuenta las respuestas anteriores:**

8. Resultado del cribado de S. de Sjögren ☐ Positivo ☐ Negativo
9. ¿Mantiene usted la sospecha de S. de Sjögren? ☐ Sí ☐ No



10. Motivo de la sospecha negativa (indicar en caso de que se decida no mantener la sospecha cuando el resultado del cribado de acuerdo a los criterios definidos por el comité científico es positivo):

#### Sospecha de lupus eritematoso sistémico. Cuestionario telefónico

1. ¿Alguna vez ha tenido artritis durante más de 3 meses? ☐ Sí ☐ No
2. ¿Se le ponen con el frío los dedos blancos, con hormigueo y dolorosos? ☐ Sí ☐ No
3. ¿Ha tenido alguna vez llagas en la boca durante más de 2 semanas seguidas? ☐ Sí ☐ No
4. ¿Le han dicho alguna vez que tuviera Ud. las células de la sangre bajas (anemia, leucocitos bajos, plaquetas bajas)? ☐ Sí ☐ No
5. ¿Le ha salido alguna vez una erupción rosada y abultada en las mejillas que le haya durado más de 1 mes? ☐ Sí ☐ No
6. ¿Le sale un sarpullido en la piel después de estar al sol (y no como en una quemadura por sol normal)? ☐ Sí ☐ No
7. ¿Le ha resultado alguna vez doloroso respirar profundamente y le ha durado esta sensación más de unos pocos días? ☐ Sí ☐ No
8. ¿Le han dicho alguna vez que tuviera proteínas en la orina? ☐ Sí ☐ No
9. ¿Se le ha caído el pelo con rapidez y en grandes cantidades alguna vez? ☐ Sí ☐ No
10. ¿Ha tenido alguna vez una convulsión o ataque epiléptico? ☐ Sí ☐ No

#### Teniendo en cuenta las respuestas anteriores:

11. Resultado del cribado de Lupus eritematoso sistémico ☐ Positivo ☐ Negativo
12. ¿Mantiene usted la sospecha de Lupus eritematoso sistémico? ☐ Sí ☐ No
13. Motivo de la sospecha negativa (indicar en caso de que se decida no mantener la sospecha cuando el resultado del cribado es positivo):
